# Supplementary material for: The HMG-CoA reductase inhibitor, simvastatin, exhibits anti-metastatic and anti-tumorigenic effects in ovarian cancer
Source: PubMed Central journal article supplement (PMC4808044; doi:10.18632/oncotarget.5834), 2015-10-16
Supplement: oncotarget-07-0946-s001.pdf [file oncotarget-07-0946-s001.pdf]

## SUPPLEMENTARY FIGURE

A

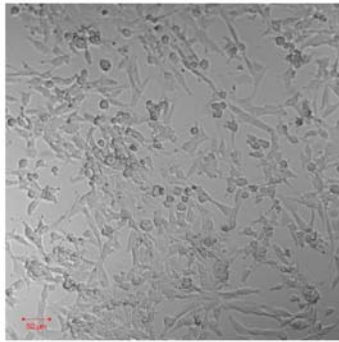

B

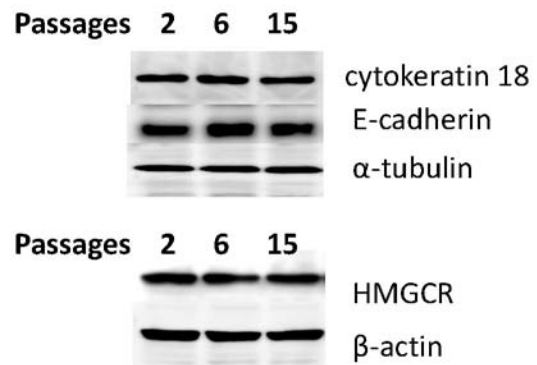

**Supplementary Figure S1: Cellular morphology and expression of keratin, E-cadherin and HMGR in M909 cells.** Morphological appearance of the M909 at passage 6 was seen in Fig A. Western blotting showed that cytokeratin 18, E-cadherin and HMGR were positive in M909 cells at passage 2, 6 and 15 (Fig. B).
